# Supplementary material for: Room-temperature barocaloric effect in [Fe(pap-5NO2)2] spin-crossover material
Source: Royal Society of Chemistry journal article supplement (doi:10.1039/d5ta00033e), 2025-01-01
Supplement: d5ta00033e1.pdf [file d5ta00033e1.pdf]

## Supplementary Information

### Room-temperature barocaloric effect in [Fe(pap-5NO<sub>2</sub>)<sub>2</sub>] spin-crossover material

David Gracia, Vera Cuartero, Catalin Popescu, Adelais Trapali, Talal Mallah, Marie-Laure Boillot, Javier Blasco, Gloria Subías, and Marco Evangelisti

|                                                                                                        | Page |
|--------------------------------------------------------------------------------------------------------|------|
| <b>FIG. S1.</b> Experimental and calculated XRPD patterns of [Fe(pap-5NO <sub>2</sub> ) <sub>2</sub> ] | 2    |
| <b>FIG. S2.</b> Magnetization of [Fe(pap-5NO <sub>2</sub> ) <sub>2</sub> ] with and without Apiezon H  | 2    |
| <b>FIG. S3.</b> Pressure dependence of the HS and LS molar fractions at 310 and 330 K                  | 3    |
| <b>FIG. S4.</b> Pressure dependence of the unit-cell parameters at 320 K                               | 3    |
| <b>FIG. S5.</b> Thermograms for multiple temperature scans                                             | 4    |

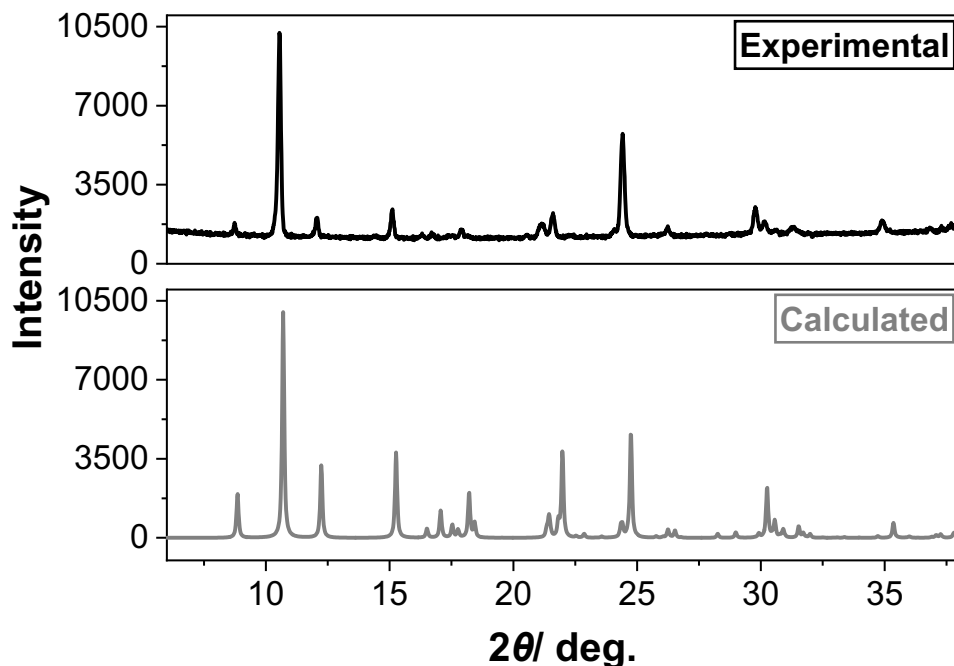

**FIG. S1.** Experimental (top-black line) and calculated (bottom-grey line) X-ray powder diffraction patterns for  $[\text{Fe}(\text{pap-5NO}_2)_2]$ . The calculated diffractogram was obtained from single-crystal X-ray diffraction data collected at 100 K.

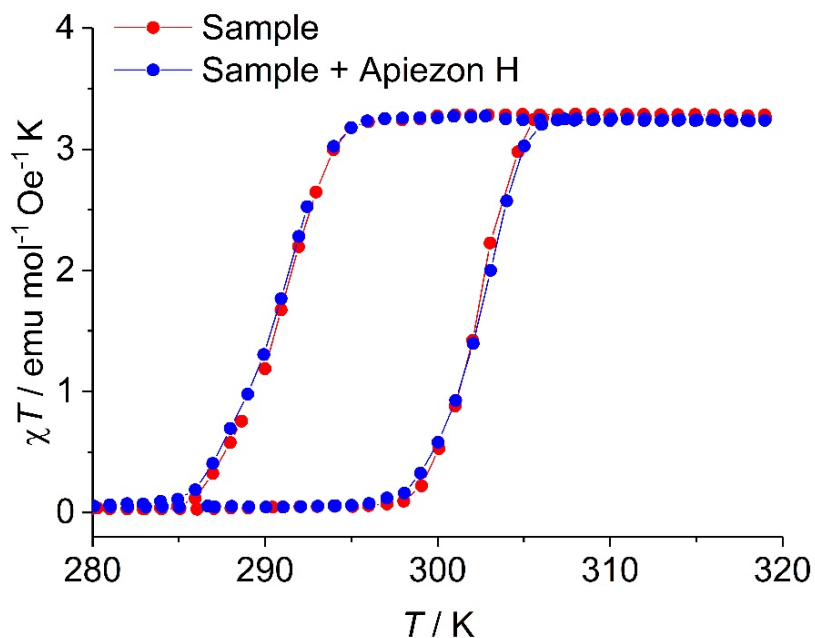

**FIG. S2.** Magnetic susceptibility-temperature product,  $\chi T$ , for  $[\text{Fe}(\text{pap-5NO}_2)_2]$ , collected for  $B = 1$  T. The sample was prepared in two forms: as bare crystallites and embedded in Apiezon H, i.e., replicating the experimental conditions of the high-pressure calorimetry measurements. The reproducibility indicates that the presence of the thermal grease does not affect the properties of  $[\text{Fe}(\text{pap-5NO}_2)_2]$ .

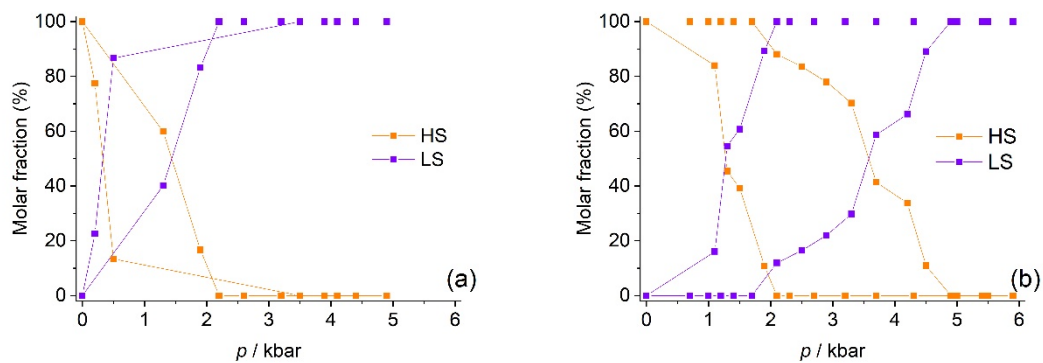

**FIG. S3.** Pressure dependence of each molar fraction in  $[\text{Fe}(\text{pap-5NO}_2)_2]$ , collected at 310 K (a) and 330 K (b).

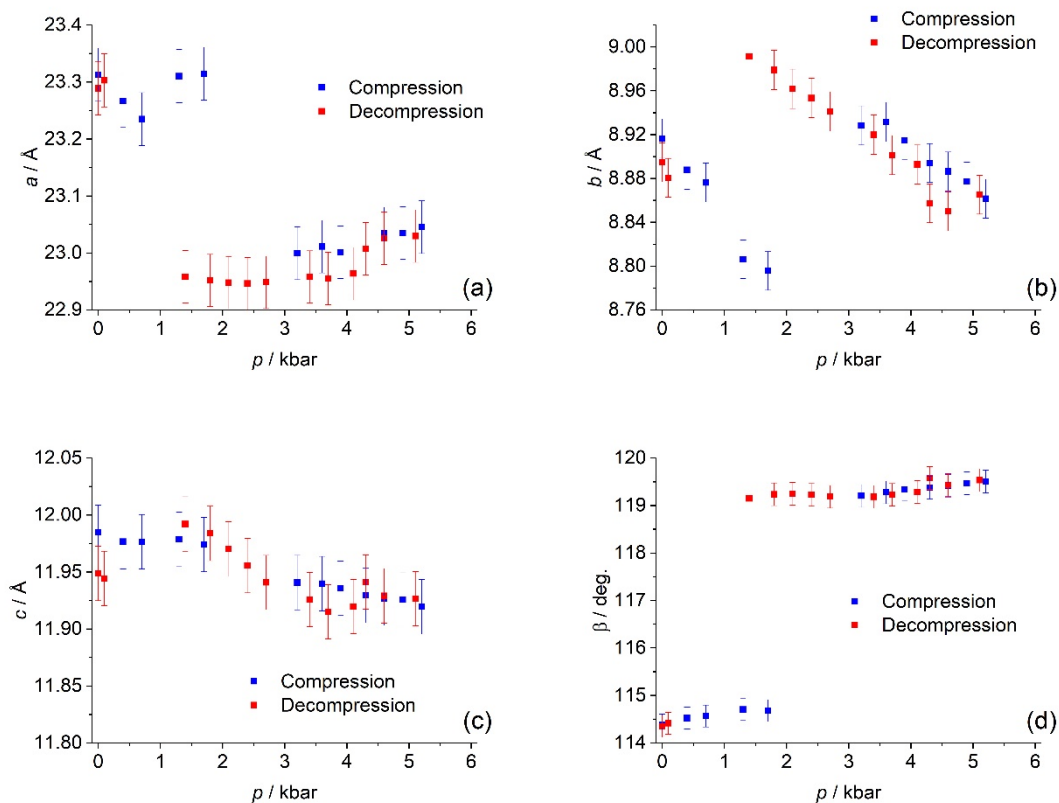

**FIG. S4.** Monoclinic unit-cell parameters  $a$  (a),  $b$  (b),  $c$  (c), and  $\beta$  (d) of  $[\text{Fe}(\text{pap-5NO}_2)_2]$ , as a function of pressure, for 320 K.

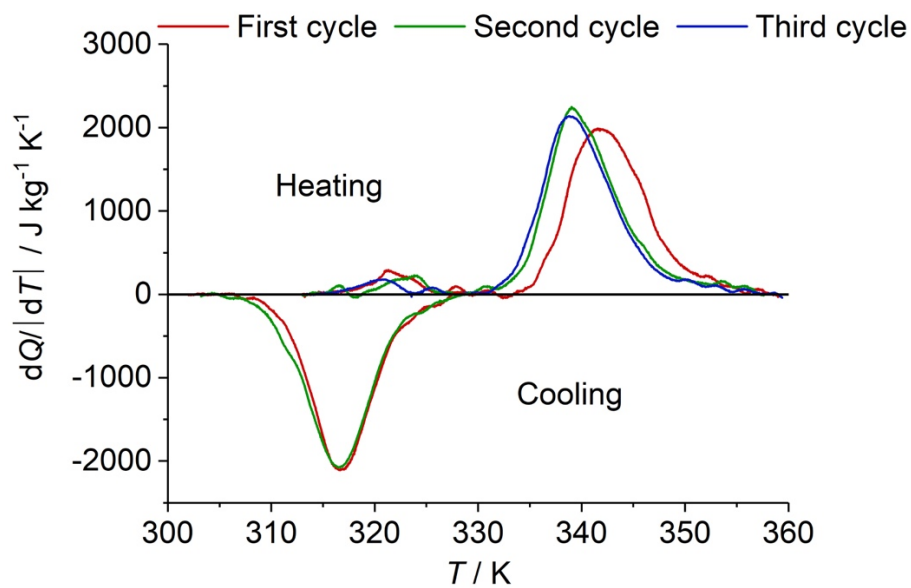

**FIG. S5.** Representative isobaric thermograms at a pressure of  $p = 1.4$  kbar, upon baseline subtraction, for  $[\text{Fe}(\text{pap-5NO}_2)_2]$ , for the first, second and third thermal cycles.
